# Supplementary material for: Secondary organic aerosol formed by EURO 5 gasoline vehicle emissions: chemical composition and gas-to-particle phase partitioning
Source: Copernicus journal article supplement (doi:10.5194/egusphere-2023-1894), 2023-09-13
Supplement: Supplementary file 1 [file egusphere-2023-1894-supplement.pdf]

1

2 **Supplementary information for manuscript**

3 **Secondary organic aerosol formed by EURO 5 gasoline vehicle emissions:**  
4 **Chemical composition and gas-to-particle phase partitioning**

5 Kostenidou Evangelia<sup>1,a</sup>, Marques Baptiste<sup>1,2</sup>, Temime-Roussel Brice<sup>1</sup>, Liu Yao<sup>3</sup>,  
6 Vansenant Boris<sup>3</sup>, Sartelet Karine<sup>4</sup>, and D'Anna Barbara<sup>1</sup>

7 <sup>1</sup>Aix-Marseille Univ, CNRS, LCE, Marseille, France

8 <sup>2</sup>French Agency for Ecological Transition, ADEME, 49000 Angers, France

9 <sup>3</sup>AME-EASE, University Gustave Eiffel, Univ Lyon, F-69675 Lyon, France

10 <sup>4</sup>CEREA, Ecole des Ponts ParisTech, EdF R&D, 77455 Marne-la Vallée, France

11 <sup>a</sup>Now at: Department of Environmental Engineering, Democritus University of Thrace, 67100 Xanthi,  
12 Greece

13 *Correspondence to:* Evangelia Kostenidou (ekosteni@env.duth.gr) and Barbara D'Anna  
14 (barbara.danna@univ-amu.fr)

15

16 **Quantification of the PTR-ToF-MS signal**

17 Ionization of organic compounds (except some small hydrocarbons) by PTR-MS occurs  
18 with a collisional rate, which can be accurately predicted by ion–molecule collision  
19 theories (Ellis et al. 2013). The instrumental response factors for pure hydrocarbons  
20 were estimated using the Langevin–Gioumoussis–Stevenson theory (Langevin, 1903;  
21 Gioumoussis and Stevenson 1958). The instrumental sensitivities of heteroatom-  
22 containing hydrocarbons were calculated based on the Su and Chesnavich, (1982) rate  
23 theory. Thus the instrumental response factor can be estimated using the weight, the  
24 isotropic molecular polarizability, and the dipole moment of an analyte molecule. For  
25 the molecular weight we used the observed  $m/z - 1$  (accounting for the added proton)  
26 assuming that the molecule does not fragment upon protonation. Isotropic molecular  
27 polarizabilities were determined from the analyte ions' elemental composition using the  
28 parametrization proposed by Bosque and Sales, (2002). For the dipole moment a  
29 constant value of 2.75 D was used for all heteroatom-containing analyte ions. This value  
30 corresponds to an average value of typical dipole moments of oxygenated hydrocarbons  
31 (1–4.5 D), resulting in a maximum quantification uncertainty of  $\pm 40\%$ . For example  
32 methylglyoxal, which has a low dipole moment ( $\mu\text{D} = 0.992$  D) has an uncertainty of  
33  $\pm 30\%$ . Signals with unidentified elemental composition were quantified using a proton  
34 reaction rate constant of  $2 \times 10^{-9} \text{ cm}^3 \text{ s}^{-1}$ . The total SOA mass concentration was  
35 calculated by adding the mass concentrations of all detected  $m/z$  peaks.

36  
37  
38  
39  
40  
41  
42  
43  
44  
45  
46  
47

48 **Table S1:** Number of the total m/z's detected, number of the detected m/z's with contribution higher than 0.14% to the total concentration (in  
 49 ppb) and the corresponding fraction explained by these m/z's for fresh VOC, secondary VOC and SOA.

|                                                                                 | <b>Exp #1</b> | <b>Exp #2</b> | <b>Exp #3</b> | <b>Exp #4</b> | <b>Exp #5</b> |
|---------------------------------------------------------------------------------|---------------|---------------|---------------|---------------|---------------|
| <b>Fresh VOC</b>                                                                |               |               |               |               |               |
| Number of total detected m/z's                                                  | 61            | 59            | 59            | 67            | 103           |
| Number of detected m/z's with contribution<br>>0.14% to the total concentration | 49            | 47            | 48            | 53            | 75            |
| Fraction explained by the m/z's with contribution<br>>0.14%                     | 0.99          | 0.99          | 0.99          | 0.98          | 0.96          |
| <b>SVOC</b>                                                                     |               |               |               |               |               |
| Number of total detected m/z's                                                  | 163           | 95            | 92            | 112           | 108           |
| Number of detected m/z's with contribution<br>>0.14% to the total concentration | 95            | 63            | 62            | 72            | 69            |
| Fraction explained by the m/z's with contribution<br>>0.14%                     | 0.93          | 0.97          | 0.97          | 0.96          | 0.96          |
| <b>SOA</b>                                                                      |               |               |               |               |               |
| Number of total detected m/z's                                                  | 237           | 169           | 190           | 184           | 253           |
| Number of detected m/z's with contribution<br>>0.14% to the total concentration | 156           | 110           | 124           | 113           | 179           |
| Fraction explained by the m/z's with contribution<br>>0.14%                     | 0.92          | 0.94          | 0.93          | 0.93          | 0.95          |

50

51

52 **Table S2:** List of the measured accurate  $m/z$ 's and elemental composition  $C_xH_yN_zO_w^+$   
53 of the most significant detected ions with concentration higher than 0.14% of the total  
54 detected ion concentration of the fresh emissions in the chamber (before any dilution  
55 in the chamber) during cold urban (experiments #1, 2 and 3), hot urban (experiment  
56 #4) and motorway (experiment # 5) Artemis cycles. These ions explained 85-99% of  
57 the measured concentration.

| m/z    | Molecular type                                       | Concentration (ppb) |        |        |        |        |
|--------|------------------------------------------------------|---------------------|--------|--------|--------|--------|
|        |                                                      | Exp #1              | Exp #2 | Exp #3 | Exp #4 | Exp #5 |
| 28.03  | (C <sub>2</sub> H <sub>3</sub> )H <sup>+</sup>       | 22.8                | 28.7   | 30.3   | 0.9    | 1.0    |
| 29.04  | (C <sub>2</sub> H <sub>4</sub> )H <sup>+</sup>       | 8.4                 | 7.4    | 11.5   | -      | -      |
| 31.02  | (CH <sub>2</sub> O)H <sup>+</sup>                    | 18.2                | 25.1   | 15.1   | -      | -      |
| 33.03  | (CH <sub>3</sub> OH)H <sup>+</sup>                   | 28.5                | 16.4   | 19.2   | 0.6    | 1.0    |
| 41.04  | (C <sub>3</sub> H <sub>4</sub> )H <sup>+</sup>       | 41.2                | 76.5   | 57.7   | 1.1    | 1.4    |
| 42.03  | (C <sub>2</sub> H <sub>3</sub> N)H <sup>+</sup>      | -                   | -      | 8.3    | 1.3    | 1.4    |
| 42.05  | (C <sub>3</sub> H <sub>5</sub> )H <sup>+</sup>       | 15.0                | 23.1   | 20.5   | 1.1    | 1.1    |
| 43.05  | (C <sub>3</sub> H <sub>6</sub> )H <sup>+</sup>       | 188.9               | 299.4  | 274.7  | 6.2    | 4.5    |
| 44.06  | ([13C]C <sub>2</sub> H <sub>6</sub> )H <sup>+</sup>  | 6.2                 | 9.8    | 9.2    | 0.3    | 0.4    |
| 45.03  | (C <sub>2</sub> H <sub>4</sub> O)H <sup>+</sup>      | 53.1                | 69.1   | 71.1   | 0.9    | 2.1    |
| 47.05  | (C <sub>2</sub> H <sub>6</sub> O)H <sup>+</sup>      | 97.8                | 100.2  | 106.5  | 0.7    | 1.2    |
| 56.06  | (C <sub>4</sub> H <sub>7</sub> )H <sup>+</sup>       | 20.1                | 26.7   | 25.0   | 1.5    | 0.8    |
| 57.03  | (C <sub>3</sub> H <sub>4</sub> O)H <sup>+</sup>      | 9.3                 | 10.9   | 9.8    | 0.2    | 0.3    |
| 57.07  | (C <sub>4</sub> H <sub>8</sub> )H <sup>+</sup>       | 362.8               | 493.6  | 457.1  | 14.6   | 8.0    |
| 58.07  | ([13C]C <sub>3</sub> H <sub>8</sub> )H <sup>+</sup>  | 16.3                | 21.9   | 20.2   | 0.6    | 0.4    |
| 59.05  | (C <sub>3</sub> H <sub>6</sub> O)H <sup>+</sup>      | 13.9                | 14.7   | 26.0   | 0.9    | 1.7    |
| 67.05  | (C <sub>5</sub> H <sub>6</sub> )H <sup>+</sup>       | 10.7                | 16.4   | 13.2   | -      | -      |
| 69.07  | (C <sub>5</sub> H <sub>8</sub> )H <sup>+</sup>       | 24.1                | 39.2   | 31.5   | 0.3    | 0.8    |
| 70.07  | ([13C]C <sub>4</sub> H <sub>8</sub> )H <sup>+</sup>  | 11.7                | 14.5   | 13.9   | 0.9    | 0.3    |
| 71.05  | (C <sub>4</sub> H <sub>6</sub> O)H <sup>+</sup>      | 6.9                 | 6.5    | 6.4    | -      | 0.3    |
| 71.09  | (C <sub>5</sub> H <sub>10</sub> )H <sup>+</sup>      | 134.8               | 192.1  | 166.6  | 5.1    | 3.0    |
| 72.09  | ([13C]C <sub>4</sub> H <sub>10</sub> )H <sup>+</sup> | 7.9                 | 10.6   | 9.2    | 0.3    | 0.2    |
| 78.05  | (C <sub>6</sub> H <sub>5</sub> )H <sup>+</sup>       | 10.8                | 13.9   | 15.6   | 1.6    | 0.4    |
| 79.05  | (C <sub>6</sub> H <sub>6</sub> )H <sup>+</sup>       | 155.6               | 212.4  | 245.8  | 15.7   | 5.8    |
| 80.06  | ([13C]C <sub>5</sub> H <sub>6</sub> )H <sup>+</sup>  | 11.9                | 15.1   | 17.0   | 1.1    | 0.5    |
| 81.07  | (C <sub>6</sub> H <sub>8</sub> )H <sup>+</sup>       | 5.2                 | 8.0    | 7.6    | -      | 0.2    |
| 83.09  | (C <sub>6</sub> H <sub>10</sub> )H <sup>+</sup>      | 14.8                | 19.4   | 17.0   | 0.3    | 0.4    |
| 85.10  | (C <sub>6</sub> H <sub>12</sub> )H <sup>+</sup>      | 71.6                | 87.8   | 81.9   | 2.3    | 1.7    |
| 91.05  | (C <sub>7</sub> H <sub>6</sub> )H <sup>+</sup>       | 13.1                | 14.6   | 14.9   | 0.5    | 0.4    |
| 92.06  | ([13C]C <sub>6</sub> H <sub>6</sub> )H <sup>+</sup>  | 16.6                | 22.3   | 21.4   | 1.2    | 0.2    |
| 93.07  | (C <sub>7</sub> H <sub>8</sub> )H <sup>+</sup>       | 306.7               | 381.6  | 375.1  | 13.8   | 3.8    |
| 94.07  | ([13C]C <sub>6</sub> H <sub>8</sub> )H <sup>+</sup>  | 25.2                | 29.3   | 28.5   | 1.1    | 0.4    |
| 97.10  | (C <sub>7</sub> H <sub>12</sub> )H <sup>+</sup>      | 5.2                 | 6.1    | 6.0    | -      | 0.2    |
| 105.07 | (C <sub>8</sub> H <sub>8</sub> )H <sup>+</sup>       | 34.7                | 56.3   | 44.6   | 0.8    | 1.5    |
| 106.07 | ([13C]C <sub>7</sub> H <sub>8</sub> )H <sup>+</sup>  | 34.2                | 42.7   | 41.1   | 1.3    | 0.4    |
| 107.09 | (C <sub>8</sub> H <sub>10</sub> )H <sup>+</sup>      | 824.7               | 963.7  | 1029.0 | 19.2   | 8.8    |
| 108.09 | ([13C]C <sub>7</sub> H <sub>10</sub> )H <sup>+</sup> | 77.7                | 84.0   | 86.3   | 1.7    | 0.8    |

|        |                                                      |       |       |       |     |     |
|--------|------------------------------------------------------|-------|-------|-------|-----|-----|
| 111.12 | (C <sub>8</sub> H <sub>14</sub> )H <sup>+</sup>      | 5.4   | -     | 6.2   | 0.2 | 0.3 |
| 117.07 | (C <sub>9</sub> H <sub>8</sub> )H <sup>+</sup>       | 5.2   | 10.8  | 8.9   | 0.2 | 0.4 |
| 119.09 | (C <sub>9</sub> H <sub>10</sub> )H <sup>+</sup>      | 34.1  | 47.8  | 36.5  | 0.7 | 2.1 |
| 120.09 | ([13C]C <sub>8</sub> H <sub>10</sub> )H <sup>+</sup> | 21.9  | 26.0  | 24.2  | 0.7 | 0.6 |
| 121.10 | (C <sub>9</sub> H <sub>12</sub> )H <sup>+</sup>      | 435.9 | 537.4 | 552.5 | 9.7 | 9.9 |
| 122.11 | ([13C]C <sub>8</sub> H <sub>12</sub> )H <sup>+</sup> | 46.9  | 52.8  | 53.0  | 1.0 | 1.0 |
| 129.07 | (C <sub>10</sub> H <sub>8</sub> )H <sup>+</sup>      | -     | 10.1  | 6.6   | 1.4 | 2.0 |
| 133.10 | (C <sub>10</sub> H <sub>12</sub> )H <sup>+</sup>     | 4.8   | 9.9   | 6.7   | 0.4 | 0.8 |
| 135.12 | (C <sub>10</sub> H <sub>14</sub> )H <sup>+</sup>     | 38.4  | 59.1  | 50.1  | 2.3 | 3.0 |
| 136.12 | ([13C]C <sub>9</sub> H <sub>14</sub> )H <sup>+</sup> | -     | 6.2   | -     | 0.2 | 0.3 |

**Fraction of  
the above  
compounds  
to the total  
fresh VOC**

**0.95      0.98      0.99      0.90      0.85**

58

59

60

61

62

63

64

65

66

67

68

69

70

71

72

73

74

75

76

77

78

79 **Table S3:** List of the measured accurate  $m/z$ 's and elemental composition  $C_xH_yN_zO_w^+$   
80 of the most significant detected ions with concentration higher than 0.14% of the total  
81 detected ion concentration of the secondary gas phase products produced from cold  
82 urban (experiments #1, 2 and 3), hot urban (experiment #4) and motorway (experiment  
83 # 5) Artemis cycles emissions. These ions represented 89-97% of the measured  
84 concentration.

| m/z    | Molecular type                                                     | Concentration (ppb) |        |        |        |        |
|--------|--------------------------------------------------------------------|---------------------|--------|--------|--------|--------|
|        |                                                                    | Exp #1              | Exp #2 | Exp #3 | Exp #4 | Exp #5 |
| 31.02  | (CH <sub>2</sub> O)H <sup>+</sup>                                  | 62.0                | 17.9   | 16.9   | 2.2    | 1.1    |
| 33.03  | (CH <sub>3</sub> OH)H <sup>+</sup>                                 | 5.9                 | 1.7    | 8.7    | 1.8    | 1.8    |
| 43.02  | (C <sub>2</sub> H <sub>2</sub> O)H <sup>+</sup>                    | 85.1                | 16.4   | 54.9   | 11.1   | 5.4    |
| 45.03  | (C <sub>2</sub> H <sub>4</sub> O)H <sup>+</sup>                    | 203.0               | 72.7   | 78.9   | 13.1   | 5.0    |
| 46.03  | <b>(CH<sub>3</sub>NO)H<sup>+</sup></b>                             | 12.4                | -      | 6.2    | 2.5    | 1.0    |
| 47.01  | (CH <sub>2</sub> O <sub>2</sub> )H <sup>+</sup>                    | 17.7                | 2.3    | 60.5   | 4.9    | -      |
| 57.03  | (C <sub>3</sub> H <sub>4</sub> O)H <sup>+</sup>                    | 19.8                | 6.7    | 7.6    | 1.3    | 0.8    |
| 59.01  | (C <sub>2</sub> H <sub>2</sub> O <sub>2</sub> )H <sup>+</sup>      | 3.5                 | -      | -      | -      | 0.1    |
| 59.05  | (C <sub>3</sub> H <sub>6</sub> O)H <sup>+</sup>                    | 185.3               | 66.6   | 74.3   | 18.4   | 7.7    |
| 60.04  | <b>(C<sub>2</sub>H<sub>5</sub>NO)H<sup>+</sup></b>                 | 3.9                 | -      | 2.5    | 1.1    | -      |
| 61.03  | (C <sub>2</sub> H <sub>4</sub> O <sub>2</sub> )H <sup>+</sup>      | 100.3               | 15.1   | 88.2   | 21.0   | 10.2   |
| 71.01  | (C <sub>3</sub> H <sub>2</sub> O <sub>2</sub> )H <sup>+</sup>      | 2.8                 | 0.2    | 0.4    | 0.2    | 0.1    |
| 71.05  | (C <sub>4</sub> H <sub>6</sub> O)H <sup>+</sup>                    | 12.7                | 4.1    | 2.5    | 0.8    | 0.6    |
| 73.03  | (C <sub>3</sub> H <sub>4</sub> O <sub>2</sub> )H <sup>+</sup>      | 94.3                | 28.1   | 36.0   | 4.2    | 1.7    |
| 73.06  | (C <sub>4</sub> H <sub>8</sub> O)H <sup>+</sup>                    | 42.1                | 13.4   | 13.7   | 3.1    | 1.1    |
| 74.03  | ([13C]C <sub>2</sub> H <sub>4</sub> O <sub>2</sub> )H <sup>+</sup> | 2.7                 | 0.5    | 1.2    | 0.5    | 0.4    |
| 75.04  | (C <sub>3</sub> H <sub>6</sub> O <sub>2</sub> )H <sup>+</sup>      | 18.5                | 3.7    | 12.8   | 2.0    | 1.5    |
| 77.02  | (C <sub>2</sub> H <sub>4</sub> O <sub>3</sub> )H <sup>+</sup>      | 10.0                | 1.0    | 21.5   | 1.2    | 0.5    |
| 83.01  | (C <sub>4</sub> H <sub>2</sub> O <sub>2</sub> )H <sup>+</sup>      | 7.1                 | 0.7    | 2.8    | 0.8    | 0.6    |
| 83.05  | (C <sub>5</sub> H <sub>6</sub> O)H <sup>+</sup>                    | 2.7                 | 0.6    | -      | -      | -      |
| 85.03  | (C <sub>4</sub> H <sub>4</sub> O <sub>2</sub> )H <sup>+</sup>      | 8.5                 | 1.2    | 1.4    | 0.4    | 0.2    |
| 85.06  | (C <sub>5</sub> H <sub>8</sub> O)H <sup>+</sup>                    | 6.5                 | 1.8    | 1.9    | 0.6    | 0.3    |
| 87.04  | (C <sub>4</sub> H <sub>6</sub> O <sub>2</sub> )H <sup>+</sup>      | 31.2                | 8.9    | 13.6   | 2.7    | 1.0    |
| 87.08  | (C <sub>5</sub> H <sub>10</sub> O)H <sup>+</sup>                   | 16.3                | 5.1    | 5.9    | 1.3    | 0.4    |
| 89.02  | (C <sub>3</sub> H <sub>4</sub> O <sub>3</sub> )H <sup>+</sup>      | 6.5                 | 0.6    | 2.1    | 0.7    | 0.4    |
| 89.06  | (C <sub>4</sub> H <sub>8</sub> O <sub>2</sub> )H <sup>+</sup>      | 4.4                 | 0.7    | 3.1    | 1.1    | 0.7    |
| 90.02  | <b>(C<sub>2</sub>H<sub>3</sub>NO<sub>3</sub>)H<sup>+</sup></b>     | 2.9                 | -      | 1.4    | 0.4    | 0.2    |
| 95.05  | (C <sub>6</sub> H <sub>6</sub> O)H <sup>+</sup>                    | 2.3                 | 0.6    | -      | 0.2    | -      |
| 97.03  | (C <sub>5</sub> H <sub>4</sub> O <sub>2</sub> )H <sup>+</sup>      | 8.5                 | 0.7    | 2.0    | 0.3    | 0.1    |
| 98.02  | <b>(C<sub>4</sub>H<sub>3</sub>NO<sub>2</sub>)H<sup>+</sup></b>     | 2.2                 | -      | -      | 0.2    | 0.1    |
| 99.01  | (C <sub>4</sub> H <sub>2</sub> O <sub>3</sub> )H <sup>+</sup>      | 12.9                | 1.9    | 6.5    | 0.8    | 0.9    |
| 99.04  | (C <sub>5</sub> H <sub>6</sub> O <sub>2</sub> )H <sup>+</sup>      | 23.9                | 4.9    | 3.6    | 0.7    | 0.3    |
| 99.08  | (C <sub>6</sub> H <sub>10</sub> O)H <sup>+</sup>                   | 5.6                 | 1.7    | 1.7    | 0.6    | 0.2    |
| 100.04 | <b>(C<sub>4</sub>H<sub>5</sub>NO<sub>2</sub>)H<sup>+</sup></b>     | 3.9                 | 0.5    | -      | 0.3    | 0.1    |
| 101.02 | (C <sub>4</sub> H <sub>4</sub> O <sub>3</sub> )H <sup>+</sup>      | 7.1                 | 0.7    | 2.8    | 0.8    | 0.6    |
| 101.06 | (C <sub>5</sub> H <sub>8</sub> O <sub>2</sub> )H <sup>+</sup>      | 8.6                 | 2.1    | 3.3    | 0.8    | 0.4    |
| 101.10 | (C <sub>6</sub> H <sub>12</sub> O)H <sup>+</sup>                   | 5.0                 | 1.4    | 1.6    | 0.3    | 0.1    |

|        |                                                                |      |     |     |     |     |
|--------|----------------------------------------------------------------|------|-----|-----|-----|-----|
| 103.04 | (C <sub>4</sub> H <sub>6</sub> O <sub>3</sub> )H <sup>+</sup>  | 6.0  | -   | 1.3 | 0.3 | 0.1 |
| 107.05 | (C <sub>7</sub> H <sub>6</sub> O)H <sup>+</sup>                | 7.4  | 0.6 | 2.0 | -   | -   |
| 109.03 | (C <sub>6</sub> H <sub>4</sub> O <sub>2</sub> )H <sup>+</sup>  | -    | -   | 1.8 | 0.3 | 0.4 |
| 109.07 | (C <sub>7</sub> H <sub>8</sub> O)H <sup>+</sup>                | 3.1  | 1.3 | -   | -   | -   |
| 111.04 | (C <sub>6</sub> H <sub>6</sub> O <sub>2</sub> )H <sup>+</sup>  | 11.4 | 1.0 | 2.0 | 0.2 | -   |
| 112.04 | <b>(C<sub>5</sub>H<sub>5</sub>NO<sub>2</sub>)H<sup>+</sup></b> | 4.7  | 0.6 | -   | 0.2 | -   |
| 113.02 | (C <sub>5</sub> H <sub>4</sub> O <sub>3</sub> )H <sup>+</sup>  | 25.2 | 3.4 | 8.8 | 1.0 | 0.7 |
| 113.06 | (C <sub>6</sub> H <sub>8</sub> O <sub>2</sub> )H <sup>+</sup>  | 29.0 | 8.5 | 3.6 | 0.7 | 0.3 |
| 113.10 | (C <sub>7</sub> H <sub>12</sub> O)H <sup>+</sup>               | 5.1  | 1.3 | 1.2 | 0.6 | 0.1 |
| 115.04 | (C <sub>5</sub> H <sub>6</sub> O <sub>3</sub> )H <sup>+</sup>  | 11.6 | 1.2 | 3.6 | 0.6 | 0.4 |
| 115.08 | (C <sub>6</sub> H <sub>10</sub> O <sub>2</sub> )H <sup>+</sup> | 4.1  | 1.2 | 2.1 | 0.6 | 0.2 |
| 117.02 | (C <sub>4</sub> H <sub>4</sub> O <sub>4</sub> )H <sup>+</sup>  | 2.3  | 0.2 | 0.5 | 0.1 | 0.1 |
| 121.07 | (C <sub>8</sub> H <sub>8</sub> O)H <sup>+</sup>                | 10.9 | 2.7 | 3.8 | 0.2 | -   |
| 123.04 | (C <sub>7</sub> H <sub>6</sub> O <sub>2</sub> )H <sup>+</sup>  | 3.1  | 0.5 | 1.6 | 0.2 | 0.3 |
| 125.02 | (C <sub>6</sub> H <sub>4</sub> O <sub>3</sub> )H <sup>+</sup>  | 2.3  | -   | 1.0 | 0.2 | 0.2 |
| 125.06 | (C <sub>7</sub> H <sub>8</sub> O <sub>2</sub> )H <sup>+</sup>  | 5.4  | 0.5 | 1.0 | -   | -   |
| 127.04 | (C <sub>6</sub> H <sub>6</sub> O <sub>3</sub> )H <sup>+</sup>  | 10.3 | 1.2 | 3.1 | 0.4 | 0.3 |
| 127.08 | (C <sub>7</sub> H <sub>10</sub> O <sub>2</sub> )H <sup>+</sup> | 5.6  | 1.5 | -   | -   | 0.1 |
| 127.11 | (C <sub>8</sub> H <sub>14</sub> O)H <sup>+</sup>               | 5.5  | 1.5 | 1.3 | 0.7 | -   |
| 129.06 | (C <sub>6</sub> H <sub>8</sub> O <sub>3</sub> )H <sup>+</sup>  | 7.6  | 0.8 | 2.4 | -   | 0.1 |
| 129.09 | (C <sub>7</sub> H <sub>12</sub> O <sub>2</sub> )H <sup>+</sup> | -    | 0.6 | 1.1 | 0.3 | 0.1 |
| 129.13 | (C <sub>8</sub> H <sub>16</sub> O)H <sup>+</sup>               | -    | -   | 1.2 | 0.2 | 0.1 |
| 135.08 | (C <sub>9</sub> H <sub>10</sub> O)H <sup>+</sup>               | 5.6  | 1.6 | 1.7 | -   | -   |
| 137.06 | (C <sub>8</sub> H <sub>8</sub> O <sub>2</sub> )H <sup>+</sup>  | 4.6  | 0.6 | 1.4 | 0.2 | 0.1 |
| 138.06 | <b>(C<sub>7</sub>H<sub>7</sub>NO<sub>2</sub>)H<sup>+</sup></b> | 3.8  | 0.6 | -   | -   | -   |
| 139.04 | (C <sub>7</sub> H <sub>6</sub> O <sub>3</sub> )H <sup>+</sup>  | 4.8  | 0.6 | 1.1 | 0.3 | 0.1 |
| 140.03 | <b>(C<sub>6</sub>H<sub>5</sub>NO<sub>3</sub>)H<sup>+</sup></b> | 3.8  | 0.5 | -   | 0.3 | 0.1 |
| 141.06 | (C <sub>7</sub> H <sub>8</sub> O <sub>3</sub> )H <sup>+</sup>  | 6.3  | 0.6 | 1.7 | 0.3 | 0.1 |
| 141.13 | (C <sub>9</sub> H <sub>16</sub> O)H <sup>+</sup>               | 2.5  | 0.8 | -   | 0.2 | -   |
| 143.03 | (C <sub>6</sub> H <sub>6</sub> O <sub>4</sub> )H <sup>+</sup>  | 3.2  | 0.2 | 0.6 | 0.2 | 0.1 |
| 149.02 | (C <sub>8</sub> H <sub>4</sub> O <sub>3</sub> )H <sup>+</sup>  | 2.3  | 0.5 | 1.2 | 0.3 | 0.3 |
| 152.07 | <b>(C<sub>8</sub>H<sub>9</sub>NO<sub>2</sub>)H<sup>+</sup></b> | 3.9  | 0.7 | 0.3 | 0.1 | -   |
| 154.05 | <b>(C<sub>7</sub>H<sub>7</sub>NO<sub>3</sub>)H<sup>+</sup></b> | 4.2  | -   | 1.2 | 0.3 | 0.1 |
| 168.07 | <b>(C<sub>8</sub>H<sub>9</sub>NO<sub>3</sub>)H<sup>+</sup></b> | 6.4  | 0.6 | 1.8 | 0.2 | -   |
| 171.03 | (C <sub>7</sub> H <sub>6</sub> O <sub>5</sub> )H <sup>+</sup>  | 1.4  | 0.1 | 0.1 | -   | -   |
| 173.04 | (C <sub>7</sub> H <sub>8</sub> O <sub>5</sub> )H <sup>+</sup>  | 3.8  | 0.1 | 0.3 | -   | -   |

**Fraction of  
the above  
compounds  
to the total  
secondary  
VOC**

**0.89      0.96      0.97      0.97      0.96**

85

86

87

88

89 **Table S4:** Supplementary information about SOA composition for the 5 experiments.

| Number of experiments                                       | Exp #1     | Exp #2     | Exp #3     | Exp #4    | Exp #5   |
|-------------------------------------------------------------|------------|------------|------------|-----------|----------|
| Type of cycle                                               | Cold Urban | Cold Urban | Cold Urban | Hot Urban | Motorway |
| <b>Based on CHARON/PTR-ToF-MS</b>                           |            |            |            |           |          |
| Fraction (of ppb) to m/z 200 into SOA                       | 0.98       | 0.99       | 0.99       | 0.99      | 0.99     |
| Fraction of ON into SOA                                     | 0.07       | 0.06       | 0.07       | 0.07      | 0.07     |
| <b>Based on HR-ToF-AMS</b>                                  |            |            |            |           |          |
| Fraction of organonitrates into total nitrate               | 0.15       | 0.20       | 0.20       | 0.12      | 0.19     |
| Fraction of organoammoniums into total ammonium             | NA         | 0.001      | NA         | NA        | 0.13     |
| Ratio cations/anions (inorganic phase)                      | 0.75       | 1.01       | 0.99       | 0.86      | 1.15     |
| Possible HNO <sub>3</sub> (μg m <sup>-3</sup> )             | 23.29      | NA         | 0.09       | 16.21     | NA       |
| Fraction of ammonium and nitrate in total secondary aerosol | 0.74       | 0.79       | 0.91       | 0.93      | 0.79     |

90

91

92



93 **Table S5:** List of the measured accurate  $m/z$ 's and elemental composition  $C_xH_yN_zO_w^+$   
94 of the most significant detected ions with concentration higher than 0.14% % of the  
95 total SOA concentration produced during cold urban (experiment #1, 2 and 3), hot  
96 urban (experiment #4) and motorway (experiment # 5) Artemis cycles. Concentrations  
97 are in ppb (before conversion to  $\mu\text{g m}^{-3}$  and normalization to the AMS organic mass  
98 concentration). These ions explained 79-92% of the measured concentration.

| $m/z$ | Molecular formula                                                | Concentration (ppb) |        |        |        |        |
|-------|------------------------------------------------------------------|---------------------|--------|--------|--------|--------|
|       |                                                                  | Exp #1              | Exp #2 | Exp #3 | Exp #4 | Exp #5 |
| 31.02 | $(\text{CH}_2\text{O})\text{H}^+$                                | 4.6                 | 0.6    | 1.5    | 0.4    | -      |
| 33.03 | $(\text{CH}_3\text{OH})\text{H}^+$                               | -                   | 10.3   | 30.8   | 20.8   | 3.8    |
| 42.01 | $(\text{C}_2\text{HO})\text{H}^+$                                | 2.6                 | 0.3    | -      | 0.4    | 0.7    |
| 43.02 | $\text{C}_2\text{H}_3\text{O}^+$                                 | 72                  | 6.7    | 22.3   | 8.8    | 0.5    |
| 45.00 | $(\text{CO}_2)\text{H}^+$                                        | 1.8                 | 0.9    | -      | 2.5    | 1.3    |
| 45.03 | $(\text{C}_2\text{H}_4\text{O})\text{H}^+$                       | 34.4                | 2.5    | 8.2    | 4.2    | -      |
| 47.01 | $(\text{CH}_2\text{O}_2)\text{H}^+$                              | 65.9                | 6.4    | 12.5   | 8.9    | 0.1    |
| 57.03 | $(\text{C}_3\text{H}_4\text{O})\text{H}^+$                       | 13.1                | 0.6    | 2.4    | 0.8    | 0.2    |
| 58.03 | $(\text{C}_2\text{H}_3\text{NO})\text{H}^+$                      | 5.5                 | 0.5    | 0.8    | 0.6    | -      |
| 59.01 | $(\text{C}_2\text{H}_2\text{O}_2)\text{H}^+$                     | 5.6                 | -      | -      | 0.9    | 0.1    |
| 59.05 | $(\text{C}_3\text{H}_6\text{O})\text{H}^+$                       | 30.7                | 8.1    | 8.4    | 11.8   | -      |
| 60.04 | $(\text{C}_2\text{H}_5\text{NO})\text{H}^+$                      | 8.3                 | 1      | 3.7    | 2      | 0.2    |
| 61.03 | $(\text{C}_2\text{H}_4\text{O}_2)\text{H}^+$                     | 57.5                | 5      | 22.1   | 9.8    | 0.7    |
| 65.02 | $\text{H}_2\text{O}(\text{CH}_2\text{O}_2)\text{H}^+$            | 7.5                 | 0.6    | 1.8    | 1.4    | -      |
| 69.03 | $(\text{C}_4\text{H}_4\text{O})\text{H}^+$                       | 2.9                 | 0.2    | 0.5    | 0.2    | -      |
| 71.01 | $(\text{C}_3\text{H}_2\text{O}_2)\text{H}^+$                     | 6.3                 | 0.3    | 1      | 0.5    | -      |
| 71.05 | $(\text{C}_4\text{H}_6\text{O})\text{H}^+$                       | 5.2                 | 0.2    | 0.8    | 0.5    | 0.2    |
| 72.04 | $(\text{C}_3\text{H}_5\text{NO})\text{H}^+$                      | 2                   | 0.2    | 0.5    | 0.3    | -      |
| 73.03 | $(\text{C}_3\text{H}_4\text{O}_2)\text{H}^+$                     | 38.8                | 3.3    | 12.8   | 5      | 0.6    |
| 74.02 | $(\text{C}_2\text{H}_3\text{NO}_2)\text{H}^+$                    | 8.1                 | 0.6    | 1.9    | 1.4    | -      |
| 74.03 | $([13\text{C}]\text{C}_2\text{H}_4\text{O}_2)\text{H}^+$         | 2.6                 | 0.2    | 0.9    | -      | -      |
| 75.01 | $(\text{C}_2\text{H}_2\text{O}_3)\text{H}^+$                     | 2.2                 | 0.2    | 0.6    | 0.3    | -      |
| 75.04 | $(\text{C}_3\text{H}_6\text{O}_2)\text{H}^+$                     | 15.7                | 1.3    | 5.2    | 1.7    | 0.3    |
| 76.04 | $(\text{C}_2\text{H}_5\text{NO}_2)\text{H}^+$                    | 2.2                 | 0.2    | 0.8    | 0.5    | -      |
| 77.02 | $(\text{C}_2\text{H}_4\text{O}_3)\text{H}^+$                     | 4.5                 | 0.3    | 1.8    | 0.5    | 0.1    |
| 79.04 | $((\text{C}_2\text{H}_4\text{O}_2)\text{H}_2\text{O})\text{H}^+$ | 1.7                 | -      | 0.2    | 0.1    | -      |
| 83.01 | $(\text{C}_4\text{H}_2\text{O}_2)\text{H}^+$                     | 1.7                 | 0.1    | 0.3    | 0.2    | -      |
| 83.05 | $(\text{C}_5\text{H}_6\text{O})\text{H}^+$                       | 5.5                 | 0.2    | 0.9    | 0.4    | 0.1    |
| 84.04 | $(\text{C}_4\text{H}_5\text{NO})\text{H}^+$                      | 1.8                 | 0.1    | -      | 0.2    | -      |
| 85.03 | $(\text{C}_4\text{H}_4\text{O}_2)\text{H}^+$                     | 16.1                | 0.8    | 2.9    | 1.2    | 0.2    |
| 85.06 | $(\text{C}_5\text{H}_8\text{O})\text{H}^+$                       | 3                   | 0.1    | 0.6    | 0.4    | 0.1    |
| 86.03 | $([13\text{C}]\text{C}_3\text{H}_4\text{O}_2)\text{H}^+$         | 3.6                 | 0.2    | 0.9    | 0.5    | 0.1    |
| 87.01 | $(\text{C}_3\text{H}_2\text{O}_3)\text{H}^+$                     | 3.2                 | -      | -      | 0.3    | 0.1    |
| 87.04 | $(\text{C}_4\text{H}_6\text{O}_2)\text{H}^+$                     | 22.9                | 1.5    | 6.8    | 2.5    | 0.4    |
| 88.05 | $([13\text{C}]\text{C}_3\text{H}_6\text{O}_2)\text{H}^+$         | -                   | 0.2    | 0.9    | 0.4    | -      |
| 89.02 | $(\text{C}_3\text{H}_4\text{O}_3)\text{H}^+$                     | 18.2                | 1      | 4.4    | 3.3    | 0.3    |
| 89.06 | $(\text{C}_4\text{H}_8\text{O}_2)\text{H}^+$                     | 2.3                 | 0.3    | 1.3    | 0.8    | 0.3    |

|        |                                                          |      |     |     |     |     |
|--------|----------------------------------------------------------|------|-----|-----|-----|-----|
| 90.02  | $(\text{C}_2\text{H}_3\text{NO}_3)\text{H}^+$            | 6.5  | 0.7 | 7.4 | 2.2 | 0.8 |
| 91.04  | $(\text{C}_3\text{H}_6\text{O}_3)\text{H}^+$             | 4.2  | 0.3 | 1.1 | 0.3 | -   |
| 93.05  | $(\text{C}_5\text{H}_4\text{N}_2)\text{H}^+$             | 2    | 0.2 | 0.7 | 0.4 | -   |
| 95.05  | $(\text{C}_6\text{H}_6\text{O})\text{H}_+$               | 3.4  | 0.1 | 0.2 | -   | 0.1 |
| 97.03  | $(\text{C}_5\text{H}_4\text{O}_2)\text{H}^+$             | 10.8 | 0.6 | 1.7 | 0.9 | -   |
| 97.06  | $(\text{C}_6\text{H}_8\text{O})\text{H}^+$               | 7.5  | 0.3 | 1   | 0.4 | -   |
| 98.03  | $([13\text{C}]\text{C}_4\text{H}_4\text{O}_2)\text{H}^+$ | 4.7  | 0.3 | 0.8 | 0.6 | 0.1 |
| 99.01  | $(\text{C}_4\text{H}_2\text{O}_3)\text{H}^+$             | 21.3 | 1.7 | 1.6 | 1.9 | 0.5 |
| 99.04  | $(\text{C}_5\text{H}_6\text{O}_2)\text{H}^+$             | 20.3 | 1.1 | 4.2 | 1.6 | 0.3 |
| 100.04 | $(\text{C}_4\text{H}_5\text{NO}_2)\text{H}^+$            | 5.2  | 0.3 | 1   | 0.8 | 0.1 |
| 101.02 | $(\text{C}_4\text{H}_4\text{O}_3)\text{H}^+$             | 18.5 | 1.3 | 3.9 | 2   | 0.3 |
| 101.06 | $(\text{C}_5\text{H}_8\text{O}_2)\text{H}^+$             | 6.9  | 0.4 | 2.3 | 0.9 | 0.2 |
| 103.04 | $(\text{C}_4\text{H}_6\text{O}_3)\text{H}^+$             | 14   | 0.7 | 4   | 1.3 | 0.2 |
| 104.04 | $([13\text{C}]\text{C}_3\text{H}_6\text{O}_3)\text{H}^+$ | 2.3  | 0.2 | 0.9 | 0.3 | -   |
| 105.02 | $(\text{C}_3\text{H}_4\text{O}_4)\text{H}^+$             | 7.4  | 0.4 | 2.1 | 0.6 | 0.2 |
| 107.05 | $(\text{C}_7\text{H}_6\text{O})\text{H}^+$               | 6.4  | 0.1 | 0.4 | 0.1 | 0.1 |
| 109.03 | $(\text{C}_6\text{H}_4\text{O}_2)\text{H}^+$             | 1.6  | 0.1 | 0.2 | 0.2 | -   |
| 109.07 | $(\text{C}_7\text{H}_8\text{O})\text{H}^+$               | 5.3  | 0.2 | 0.5 | -   | -   |
| 111.04 | $(\text{C}_6\text{H}_6\text{O}_2)\text{H}^+$             | 18   | 0.7 | 2.6 | 1   | 0.1 |
| 111.08 | $(\text{C}_7\text{H}_{10}\text{O})\text{H}^+$            | 5.6  | 0.2 | 0.6 | 0.2 | -   |
| 112.04 | $(\text{C}_5\text{H}_5\text{NO}_2)\text{H}^+$            | 5.8  | 0.3 | 1   | 0.6 | -   |
| 113.02 | $(\text{C}_5\text{H}_4\text{O}_3)\text{H}^+$             | 24.9 | 1.9 | 4.1 | 1.8 | 0.4 |
| 113.06 | $(\text{C}_6\text{H}_8\text{O}_2)\text{H}^+$             | 13.6 | 0.7 | 3   | 1   | 0.1 |
| 114.03 | $([13\text{C}]\text{C}_4\text{H}_4\text{O}_3)\text{H}^+$ | 3.4  | 0.2 | 0.9 | 0.5 | 0.1 |
| 115.02 | $(\text{C}_8\text{H}_2\text{O})\text{H}^+$               | 4.3  | 0.1 | 0.7 | 0.6 | 0.3 |
| 115.04 | $(\text{C}_5\text{H}_6\text{O}_3)\text{H}^+$             | 26.6 | 2.1 | 7.7 | 2.4 | 0.3 |
| 115.08 | $(\text{C}_6\text{H}_{10}\text{O}_2)\text{H}^+$          | 2.2  | 0.2 | 0.8 | 0.3 | 0.1 |
| 116.04 | $(\text{C}_4\text{H}_5\text{NO}_3)\text{H}^+$            | 4.6  | 0.2 | 1.2 | 0.6 | 0.1 |
| 117.02 | $(\text{C}_4\text{H}_4\text{O}_4)\text{H}^+$             | 13.5 | 0.6 | 1.3 | 0.7 | 0.1 |
| 117.06 | $(\text{C}_5\text{H}_8\text{O}_3)\text{H}^+$             | 6.7  | 0.5 | 2.6 | 0.9 | 0.2 |
| 119.03 | $(\text{C}_4\text{H}_6\text{O}_4)\text{H}^+$             | 3.7  | 0.2 | 0.6 | -   | -   |
| 123.04 | $(\text{C}_7\text{H}_6\text{O}_2)\text{H}^+$             | 4.6  | 0.2 | 0.7 | 0.5 | 0.5 |
| 124.05 | $([13\text{C}]\text{C}_6\text{H}_6\text{O}_2)\text{H}^+$ | 3.5  | 0.1 | 0.5 | 0.3 | 0.1 |
| 125.02 | $(\text{C}_6\text{H}_4\text{O}_3)\text{H}^+$             | 4.1  | 0.2 | 0.8 | 0.4 | 0.1 |
| 125.06 | $(\text{C}_7\text{H}_8\text{O}_2)\text{H}^+$             | 11.5 | 0.5 | 2.2 | 0.6 | 0.1 |
| 126.02 | $(\text{C}_2\text{H}_5\text{O}_6)\text{H}^+$             | 1.9  | 0.4 | 0.6 | 0.3 | -   |
| 126.06 | $(\text{C}_6\text{H}_7\text{NO}_2)\text{H}^+$            | 3.5  | 0.2 | 0.7 | 0.3 | -   |
| 127.04 | $(\text{C}_6\text{H}_6\text{O}_3)\text{H}^+$             | 18.5 | 0.9 | 4.6 | 1.4 | 0.2 |
| 127.08 | $(\text{C}_7\text{H}_{10}\text{O}_2)\text{H}^+$          | 4.7  | 0.2 | 0.9 | 0.3 | 0.1 |
| 128.04 | $([13\text{C}]\text{C}_5\text{H}_6\text{O}_3)\text{H}^+$ | 2.3  | 0.2 | 1.2 | 0.5 | 0.1 |
| 129.02 | $(\text{C}_5\text{H}_4\text{O}_4)\text{H}^+$             | 4.2  | 0.2 | 1.1 | 0.5 | 0.1 |
| 129.06 | $(\text{C}_6\text{H}_8\text{O}_3)\text{H}^+$             | 15   | 0.9 | 4.3 | 1.2 | 0.2 |
| 130.04 | $(\text{C}_9\text{H}_5\text{O})\text{H}^+$               | 3.8  | 0.2 | 0.7 | 0.4 | -   |
| 130.06 | $([13\text{C}]\text{C}_5\text{H}_8\text{O}_3)\text{H}^+$ | 2.9  | 0.2 | 0.8 | 0.3 | -   |
| 131.03 | $(\text{C}_5\text{H}_6\text{O}_4)\text{H}^+$             | 8.4  | 0.4 | 2   | 0.7 | 0.1 |
| 131.07 | $(\text{C}_6\text{H}_{10}\text{O}_3)\text{H}^+$          | -    | -   | 0.7 | 0.2 | 0.1 |

|        |                       |      |     |     |     |     |
|--------|-----------------------|------|-----|-----|-----|-----|
| 132.04 | $([13C]C_4H_6O_4)H^+$ | 1.8  | -   | 0.6 | 0.3 | -   |
| 133.05 | $(C_5H_8O_4)H^+$      | 4    | 0.2 | 1   | 0.4 | -   |
| 137.06 | $(C_8H_8O_2)H^+$      | 5.7  | 0.3 | 0.8 | -   | 0.1 |
| 138.05 | $(C_7H_7NO_2)H^+$     | 3.2  | 0.1 | 0.3 | 0.1 | 0.1 |
| 139.04 | $(C_7H_6O_3)H^+$      | 6.8  | 0.4 | 1.6 | 0.6 | 0.1 |
| 139.08 | $(C_8H_{10}O_2)H^+$   | 8.4  | 0.3 | 1   | 0.3 | -   |
| 140.03 | $(C_6H_5NO_3)H^+$     | 4.1  | 0.2 | 0.7 | 0.4 | 0.1 |
| 141.02 | $(C_6H_4O_4)H^+$      | 2.8  | -   | 0.5 | 0.3 | 0.1 |
| 141.06 | $(C_7H_8O_3)H^+$      | 16.1 | 0.7 | 3.9 | 1.1 | 0.2 |
| 142.06 | $([13C]C_6H_8O_3)H^+$ | 6.2  | 0.2 | 1.2 | 0.5 | -   |
| 143.03 | $(C_6H_6O_4)H^+$      | 8.1  | 0.4 | 2.1 | 0.8 | 0.1 |
| 143.07 | $(C_7H_{10}O_3)H^+$   | 3.8  | 0.2 | 1.1 | 0.3 | 0.1 |
| 144.04 | $([13C]C_5H_6O_4)H^+$ | 2.9  | 0.2 | 0.7 | 0.3 | -   |
| 145.05 | $(C_6H_8O_4)H^+$      | 6.5  | 0.3 | 1.7 | 0.5 | 0.1 |
| 149.02 | $(C_8H_4O_3)H^+$      | 6.5  | 0.5 | 0.7 | 1   | 0.2 |
| 151.04 | $(C_8H_6O_3)H^+$      | 2.7  | 0.1 | -   | -   | 0.1 |
| 153.06 | $(C_8H_8O_3)H^+$      | 10.4 | 0.4 | 2   | 0.5 | 0.1 |
| 152.07 | $(C_8H_9NO_2)H^+$     | 2.1  | 0.1 | 0.1 | -   | -   |
| 154.05 | $(C_7H_7NO_3)H^+$     | 4.9  | 0.2 | 0.8 | 0.3 | 0.1 |
| 155.03 | $(C_7H_6O_4)H^+$      | 4.6  | 0.2 | 0.9 | 0.3 | 0.1 |
| 155.07 | $(C_8H_{10}O_3)H^+$   | 10.2 | 0.3 | 1.8 | 0.5 | 0.1 |
| 156.03 | $(C_6H_5NO_4)H^+$     | 4.2  | 0.1 | 0.5 | 0.3 | -   |
| 157.05 | $(C_7H_8O_4)H^+$      | 9.6  | 0.3 | 2.5 | 0.6 | 0.1 |
| 159.03 | $(C_6H_6O_5)H^+$      | 4.3  | -   | 0.8 | 0.3 | 0.1 |
| 161.04 | $(C_6H_8O_5)H^+$      | 2.9  | -   | 0.7 | 0.2 | 0.1 |
| 163.04 | $(C_9H_6O_3)H^+$      | 3.6  | 0.2 | 0.5 | 0.4 | 0.2 |
| 167.07 | $(C_9H_{10}O_3)H^+$   | 4.6  | 0.2 | 0.9 | 0.2 | -   |
| 166.05 | $(C_8H_7NO_3)H^+$     | 2.6  | 0.1 | 0.3 | 0.1 | -   |
| 168.07 | $(C_8H_9NO_3)H^+$     | 3.7  | 0.1 | 0.4 | -   | 0.1 |
| 169.05 | $(C_8H_8O_4)H^+$      | 3.6  | 0.2 | 1   | 0.3 | -   |
| 170.05 | $(C_7H_7NO_4)H^+$     | 6.8  | 0.2 | 0.6 | -   | -   |
| 171.03 | $(C_7H_6O_5)H^+$      | 2.7  | 0.1 | 0.2 | 0.1 | -   |
| 171.07 | $(C_8H_{10}O_4)H^+$   | 11.4 | 0.3 | 2.2 | 0.5 | 0.1 |
| 173.04 | $(C_7H_8O_5)H^+$      | 7.9  | 0.2 | 1.1 | 0.3 | -   |
| 185.08 | $(C_9H_{12}O_4)H^+$   | 4.2  | 0.1 | 0.8 | -   | -   |
| 187.06 | $(C_8H_{10}O_5)H^+$   | 7.1  | 0.1 | 1.2 | 0.3 | -   |

**Fraction of  
the above  
compounds  
to the total  
SOA**

**0.83**

**0.92**

**0.89**

**0.89**

**0.79**

99

100

101

102

103 **Table S6:**  $m/z$ 's detected in both gas and particle phase, which were used for the gas-  
 104 to-particle phase partitioning and the corresponding  $\log C^*$  calculation for each ion for  
 105 all experiments.

| Number of $m/z$ | $m/z$  | Molecular formula                                              | $\log C^*$ |        |        |        |        |
|-----------------|--------|----------------------------------------------------------------|------------|--------|--------|--------|--------|
|                 |        |                                                                | Exp #1     | Exp #2 | Exp #3 | Exp #4 | Exp #5 |
| 1               | 57.03  | (C <sub>3</sub> H <sub>4</sub> O)H <sup>+</sup>                | 4.39       | 4.64   | 4.43   | 3.82   | 3.90   |
| 2               | 59.01  | (C <sub>2</sub> H <sub>2</sub> O <sub>2</sub> )H <sup>+</sup>  | 4.00       | -      | -      | -      | 3.00   |
| 3               | 59.05  | (C <sub>3</sub> H <sub>6</sub> O)H <sup>+</sup>                | 5.00       | 4.53   | 4.87   | 3.83   | -      |
| 4               | 61.03  | (C <sub>2</sub> H <sub>4</sub> O <sub>2</sub> )H <sup>+</sup>  | 4.46       | 4.10   | 4.52   | 3.97   | 4.30   |
| 5               | 71.05  | (C <sub>4</sub> H <sub>6</sub> O)H <sup>+</sup>                | 4.60       | 4.83   | 4.39   | 3.85   | 3.75   |
| 6               | 73.03  | (C <sub>3</sub> H <sub>4</sub> O <sub>2</sub> )H <sup>+</sup>  | 4.60       | 4.55   | 4.37   | 3.57   | 3.59   |
| 7               | 75.01  | (C <sub>2</sub> H <sub>2</sub> O <sub>3</sub> )H <sup>+</sup>  | 3.87       | 2.87   | 3.65   | 3.19   | 3.05   |
| 8               | 75.04  | (C <sub>3</sub> H <sub>6</sub> O <sub>2</sub> )H <sup>+</sup>  | 4.28       | 4.06   | 4.31   | 3.70   | 3.81   |
| 9               | 77.02  | (C <sub>2</sub> H <sub>3</sub> O <sub>3</sub> )H <sup>+</sup>  | 4.56       | 4.12   | 5.00   | 4.00   | 3.89   |
| 10              | 83.05  | (C <sub>5</sub> H <sub>6</sub> O)H <sup>+</sup>                | 3.90       | 4.05   | 3.55   | 2.99   | 2.54   |
| 11              | 85.03  | (C <sub>4</sub> H <sub>4</sub> O <sub>2</sub> )H <sup>+</sup>  | 3.94       | 3.78   | 3.59   | 3.18   | 3.24   |
| 12              | 85.06  | (C <sub>5</sub> H <sub>8</sub> O)H <sup>+</sup>                | 4.56       | 4.73   | 4.40   | 3.83   | 3.54   |
| 13              | 87.01  | (C <sub>3</sub> H <sub>2</sub> O <sub>3</sub> )H <sup>+</sup>  | 4.10       | 3.55   | 2.69   | 2.86   | 2.49   |
| 14              | 87.04  | (C <sub>4</sub> H <sub>6</sub> O <sub>2</sub> )H <sup>+</sup>  | 4.35       | 4.38   | 4.22   | 3.66   | 3.57   |
| 15              | 89.06  | (C <sub>4</sub> H <sub>8</sub> O <sub>2</sub> )H <sup>+</sup>  | 4.49       | 4.05   | 4.31   | 3.77   | 3.56   |
| 16              | 91.04  | (C <sub>3</sub> H <sub>6</sub> O <sub>3</sub> )H <sup>+</sup>  | 3.54       | -      | 4.16   | 3.23   | 3.74   |
| 17              | 95.05  | (C <sub>6</sub> H <sub>6</sub> O)H <sup>+</sup>                | 4.04       | 4.54   | -      | -      | 2.77   |
| 18              | 97.03  | C <sub>5</sub> H <sub>4</sub> O <sub>2</sub> H <sup>+</sup>    | 4.11       | 3.73   | 3.97   | 3.18   | 3.97   |
| 19              | 97.06  | (C <sub>6</sub> H <sub>8</sub> O)H <sup>+</sup>                | 3.83       | 3.92   | 3.61   | 2.95   | 3.41   |
| 20              | 99.01  | (C <sub>4</sub> H <sub>2</sub> O <sub>3</sub> )H <sup>+</sup>  | 4.00       | 3.67   | 4.54   | 3.27   | 3.41   |
| 21              | 101.02 | (C <sub>4</sub> H <sub>4</sub> O <sub>3</sub> )H <sup>+</sup>  | 3.80       | 3.36   | 3.79   | 3.25   | 3.45   |
| 22              | 101.06 | (C <sub>5</sub> H <sub>8</sub> O <sub>2</sub> )H <sup>+</sup>  | 4.31       | 4.30   | 4.08   | 3.59   | 3.39   |
| 23              | 103.04 | (C <sub>4</sub> H <sub>6</sub> O <sub>3</sub> )H <sup>+</sup>  | 3.85       | 3.33   | 3.43   | 2.94   | 3.04   |
| 24              | 103.08 | (C <sub>5</sub> H <sub>10</sub> O <sub>2</sub> )H <sup>+</sup> | -          | -      | -      | 3.64   | 3.30   |
| 25              | 105.02 | (C <sub>3</sub> H <sub>4</sub> O <sub>4</sub> )H <sup>+</sup>  | 3.60       | 3.42   | 3.05   | 2.59   | 2.67   |
| 26              | 107.05 | (C <sub>7</sub> H <sub>6</sub> O)H <sup>+</sup>                | 4.28       | 4.50   | 4.61   | -      | 2.97   |
| 27              | 109.07 | (C <sub>7</sub> H <sub>8</sub> O)H <sup>+</sup>                | 3.98       | 4.55   | 3.65   | 3.33   | 3.49   |
| 28              | 111.04 | (C <sub>6</sub> H <sub>6</sub> O <sub>2</sub> )H <sup>+</sup>  | 4.02       | 3.80   | 3.79   | 3.02   | 2.99   |
| 29              | 113.02 | (C <sub>5</sub> H <sub>4</sub> O <sub>3</sub> )H <sup>+</sup>  | 4.22       | 3.87   | 4.24   | 3.39   | 3.46   |
| 30              | 113.06 | (C <sub>6</sub> H <sub>8</sub> O <sub>2</sub> )H <sup>+</sup>  | 4.54       | 4.69   | 4.01   | 3.48   | 3.48   |
| 31              | 115.04 | (C <sub>5</sub> H <sub>6</sub> O <sub>3</sub> )H <sup>+</sup>  | 3.85       | 3.40   | 3.59   | 3.06   | 3.31   |
| 32              | 115.08 | (C <sub>6</sub> H <sub>10</sub> O <sub>2</sub> )H <sup>+</sup> | 4.48       | 4.46   | 4.34   | 3.86   | 3.46   |
| 33              | 117.02 | (C <sub>4</sub> H <sub>4</sub> O <sub>4</sub> )H <sup>+</sup>  | 3.44       | 3.05   | 3.47   | 2.90   | 3.00   |
| 34              | 117.06 | (C <sub>5</sub> H <sub>8</sub> O <sub>3</sub> )H <sup>+</sup>  | 3.62       | 2.91   | 3.59   | 2.94   | 2.67   |
| 35              | 119.03 | (C <sub>4</sub> H <sub>6</sub> O <sub>4</sub> )H <sup>+</sup>  | 3.72       | 3.00   | 3.54   | 3.13   | 3.36   |
| 36              | 121.07 | (C <sub>8</sub> H <sub>8</sub> O)H <sup>+</sup>                | 4.27       | 5.00   | 4.90   | -      | -      |
| 37              | 123.04 | (C <sub>7</sub> H <sub>6</sub> O <sub>2</sub> )H <sup>+</sup>  | 4.04       | 3.95   | 4.24   | 3.25   | 2.93   |
| 38              | 123.08 | (C <sub>8</sub> H <sub>10</sub> O)H <sup>+</sup>               | 4.35       | 5.05   | -      | -      | 2.99   |
| 39              | 125.02 | (C <sub>6</sub> H <sub>4</sub> O <sub>3</sub> )H <sup>+</sup>  | 3.95       | 3.70   | 4.04   | 3.35   | 3.64   |
| 40              | 125.06 | (C <sub>7</sub> H <sub>8</sub> O <sub>2</sub> )H <sup>+</sup>  | 3.88       | 3.62   | 3.58   | 3.02   | 3.06   |
| 41              | 127.04 | (C <sub>6</sub> H <sub>6</sub> O <sub>3</sub> )H <sup>+</sup>  | 3.96       | 3.74   | 3.75   | 3.11   | 3.31   |
| 42              | 127.08 | (C <sub>7</sub> H <sub>10</sub> O <sub>2</sub> )H <sup>+</sup> | 4.29       | 4.46   | 3.85   | 3.36   | 3.29   |
| 43              | 129.02 | (C <sub>5</sub> H <sub>4</sub> O <sub>4</sub> )H <sup>+</sup>  | 4.04       | 3.44   | 3.56   | 3.11   | 2.99   |
| 44              | 129.06 | (C <sub>6</sub> H <sub>8</sub> O <sub>3</sub> )H <sup>+</sup>  | 3.92       | 3.58   | 3.66   | 2.55   | 2.93   |
| 45              | 131.03 | (C <sub>5</sub> H <sub>6</sub> O <sub>4</sub> )H <sup>+</sup>  | 3.60       | 3.35   | 3.29   | 2.89   | 2.79   |
| 46              | 133.05 | (C <sub>5</sub> H <sub>8</sub> O <sub>4</sub> )H <sup>+</sup>  | 3.67       | 3.55   | 3.19   | 2.67   | 2.43   |

|    |        |                                                                |      |      |      |      |      |
|----|--------|----------------------------------------------------------------|------|------|------|------|------|
| 47 | 135.05 | (C <sub>8</sub> H <sub>6</sub> O <sub>2</sub> )H <sup>+</sup>  | 3.89 | 3.22 | 2.75 | -    | 1.73 |
| 48 | 135.08 | (C <sub>9</sub> H <sub>10</sub> O)H <sup>+</sup>               | 4.03 | 4.27 | -    | -    | 3.17 |
| 49 | 137.06 | (C <sub>8</sub> H <sub>8</sub> O <sub>2</sub> )H <sup>+</sup>  | 4.12 | 3.97 | 4.15 | 3.70 | 3.51 |
| 50 | 138.06 | <b>(C<sub>7</sub>H<sub>7</sub>NO<sub>2</sub>)H<sup>+</sup></b> | 4.66 | -    | -    | -    | -    |
| 51 | 139.04 | (C <sub>7</sub> H <sub>6</sub> O <sub>3</sub> )H <sup>+</sup>  | 4.06 | 3.85 | 3.76 | 3.29 | 3.15 |
| 52 | 139.08 | (C <sub>8</sub> H <sub>10</sub> O <sub>2</sub> )H <sup>+</sup> | 3.90 | 3.93 | 3.56 | 3.02 | 3.13 |
| 53 | 140.03 | <b>(C<sub>6</sub>H<sub>5</sub>NO<sub>3</sub>)H<sup>+</sup></b> | 4.18 | 3.93 | 3.92 | 3.46 | 3.23 |
| 54 | 141.06 | (C <sub>7</sub> H <sub>8</sub> O <sub>3</sub> )H <sup>+</sup>  | 3.81 | 3.57 | 3.55 | 3.01 | 3.11 |
| 55 | 143.03 | (C <sub>6</sub> H <sub>6</sub> O <sub>4</sub> )H <sup>+</sup>  | 3.81 | 3.41 | 3.35 | 2.93 | 2.77 |
| 56 | 145.05 | (C <sub>6</sub> H <sub>8</sub> O <sub>4</sub> )H <sup>+</sup>  | 3.74 | 3.39 | 3.26 | 2.74 | 2.75 |
| 57 | 147.03 | (C <sub>5</sub> H <sub>6</sub> O <sub>5</sub> )H <sup>+</sup>  | 3.90 | -    | 3.29 | -    | 2.37 |
| 58 | 149.04 | (C <sub>5</sub> H <sub>8</sub> O <sub>5</sub> )H <sup>+</sup>  | -    | -    | 3.75 | -    | 3.79 |
| 59 | 151.08 | (C <sub>9</sub> H <sub>10</sub> O <sub>2</sub> )H <sup>+</sup> | 3.97 | 3.88 | 3.93 | -    | 3.17 |
| 60 | 152.07 | <b>(C<sub>8</sub>H<sub>9</sub>NO<sub>2</sub>)H<sup>+</sup></b> | 4.49 | -    | -    | -    | -    |
| 61 | 153.06 | (C <sub>8</sub> H <sub>8</sub> O <sub>3</sub> )H <sup>+</sup>  | 3.85 | 3.65 | 3.38 | 2.43 | 2.40 |
| 62 | 154.05 | <b>(C<sub>7</sub>H<sub>7</sub>NO<sub>3</sub>)H<sup>+</sup></b> | 4.15 | 3.96 | 4.09 | 3.63 | 3.30 |
| 63 | 155.03 | (C <sub>7</sub> H <sub>6</sub> O <sub>4</sub> )H <sup>+</sup>  | 4.03 | 3.65 | 3.54 | 3.01 | 2.84 |
| 64 | 155.07 | (C <sub>8</sub> H <sub>10</sub> O <sub>3</sub> )H <sup>+</sup> | 3.87 | 3.82 | 3.56 | 3.17 | 2.89 |
| 65 | 157.05 | (C <sub>7</sub> H <sub>8</sub> O <sub>4</sub> )H <sup>+</sup>  | 3.73 | 3.35 | 3.29 | 2.86 | 2.90 |
| 66 | 168.07 | <b>(C<sub>8</sub>H<sub>9</sub>NO<sub>3</sub>)H<sup>+</sup></b> | 4.45 | 4.42 | 4.56 | -    | 3.45 |
| 67 | 170.05 | <b>(C<sub>7</sub>H<sub>7</sub>NO<sub>4</sub>)H<sup>+</sup></b> | 3.61 | 3.20 | 3.32 | 2.85 | -    |
| 68 | 173.04 | (C <sub>7</sub> H <sub>8</sub> O <sub>5</sub> )H <sup>+</sup>  | 3.90 | 3.51 | 3.32 | 2.83 | 2.61 |
| 69 | 181.05 | (C <sub>9</sub> H <sub>8</sub> O <sub>4</sub> )H <sup>+</sup>  | 3.97 | 3.56 | 3.28 | -    | 2.49 |

106

107

108

109

110

111

112

113

114

115

116

117

118

119

120

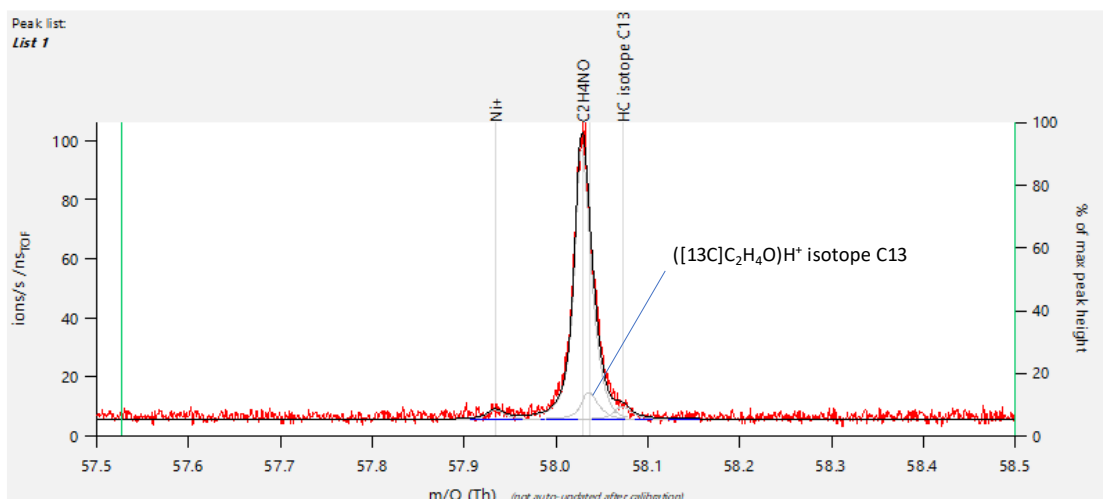

121

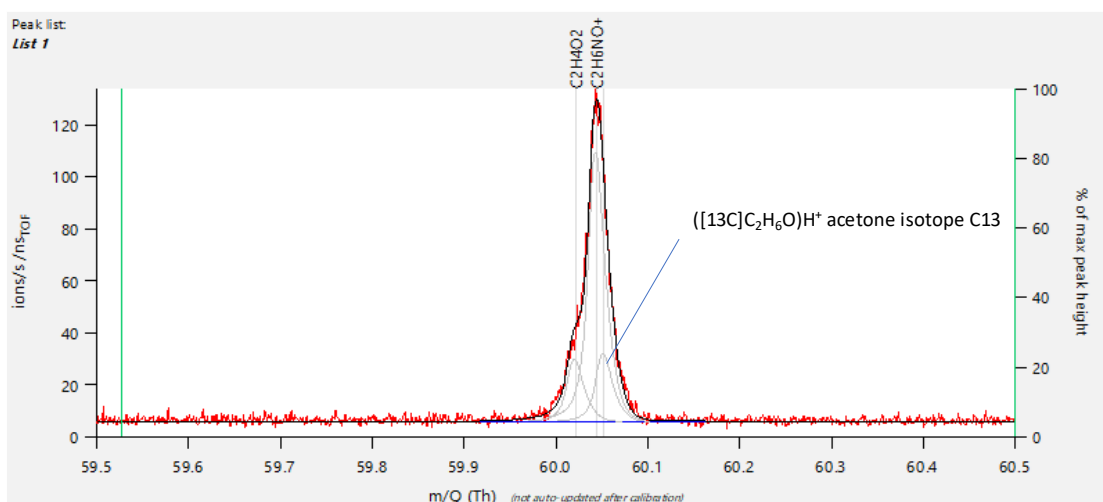

122

123 **Figure S1:** Examples of CHARON mass spectra containing ON at  $m/z$  58 (top) and  $m/z$   
 124 60 (bottom). The contribution of the isotopes was present but clearly distinguished from  
 125 the ON.

126

127

128

129

130

131

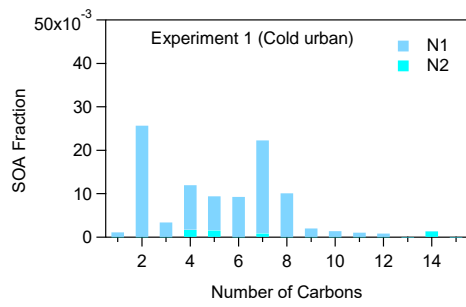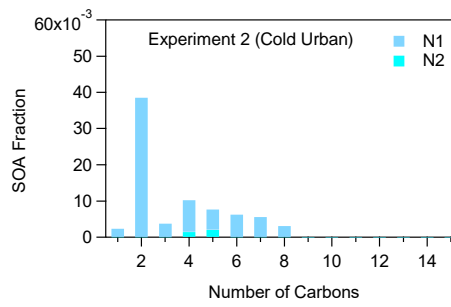

132

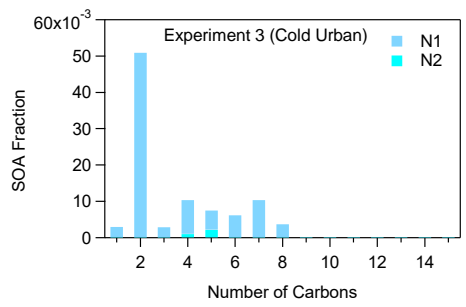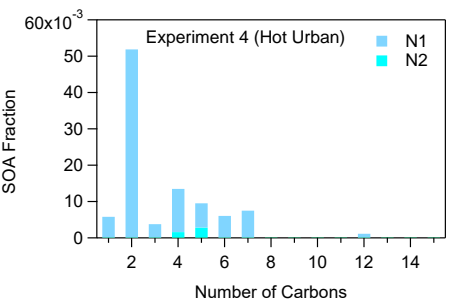

133

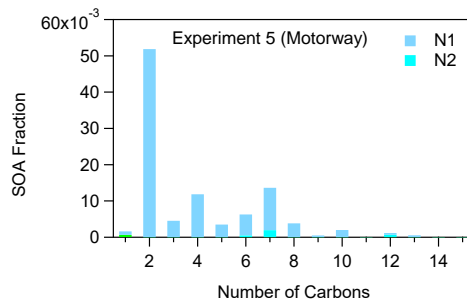

134

135 **Figure S2:** N to C distributions for the SOA formed during each one of the five  
 136 experiments.

137

138

139

140

141

142

143

144

145

146

147

148

149

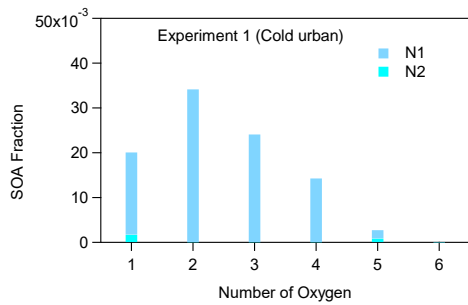

150

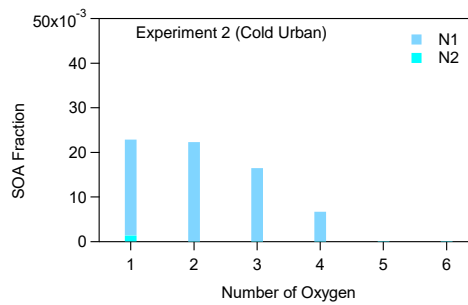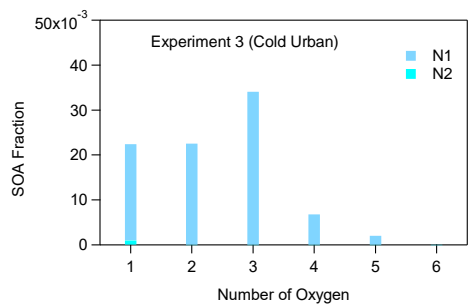

151

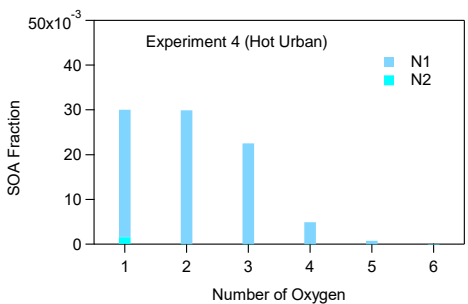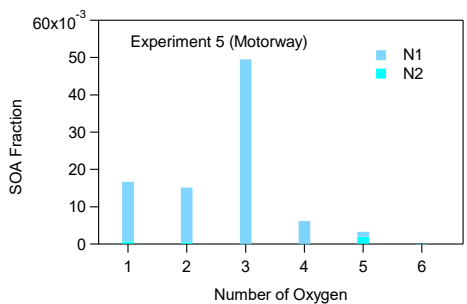

152

153 **Figure S3:** N to O distributions for the SOA formed during each one of the five  
 154 experiments.

155

156

157

158

159

160

161

162

163

164

165

166

167



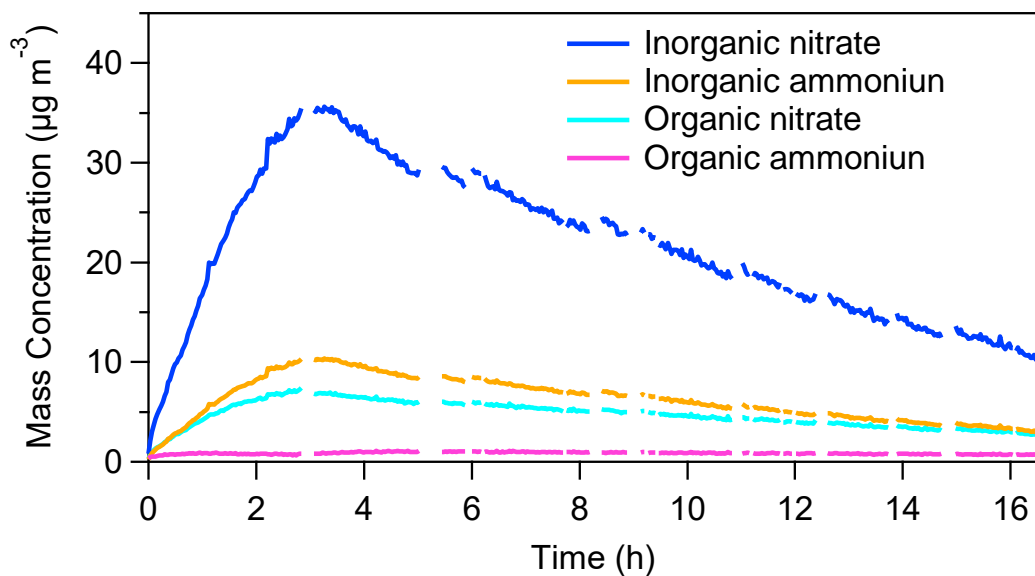

168

169

170 **Figure S4:** Time-series of inorganic nitrate, inorganic ammonium, organic nitrate and  
 171 organic ammonium mass concentrations for the experiment #5 (photo-oxidation of  
 172 motorway emissions). Time zero corresponds to the moment where the photo-oxidation  
 173 begins.

174

175

176

177

178

179

180

181

182

183

184

185

186

187

188

189

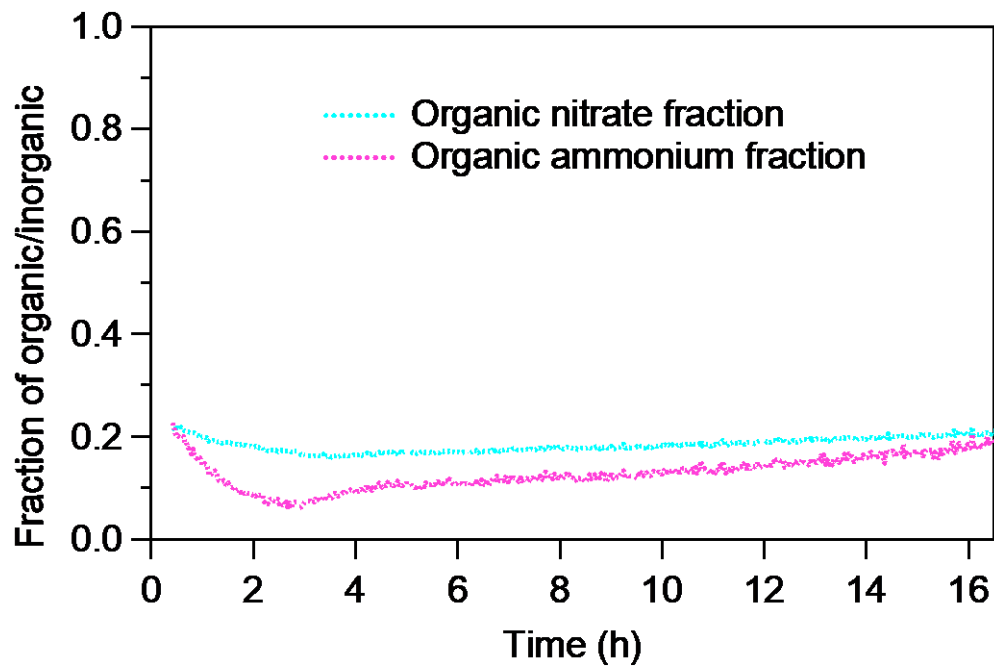

190

191

192 **Figure S5:** Mass fraction of organic nitrate and organic ammonium over the total nitrate  
193 and ammonium mass concentrations respectively for the experiment #5 (photo-  
194 oxidation of motorway emissions).

195

196

197

198

199

200

201

202

203

204

205

206

207

208

209

210

211 **References**

- 212 Bosque, R.; and Sales, J.: Polarizabilities of solvents from the chemical composition, J.  
213 Chem. Inf. Comput. Sci., 42 (5), 1154–1163, 2002.
- 214 Ellis, A. M.; Mayhew, C. A.: Proton Transfer Reaction Mass Spectrometry; John Wiley  
215 & Sons, Ltd: Hoboken, NJ, pp. 25–48, 2014.
- 216 Gioumousis, G.; Stevenson, D. P.: Reactions of gaseous molecule ions with gaseous  
217 molecules. v. theory, J. Chem. Phys., 29, 294–299, 1958.
- 218 Langevin, P. J. : Recombination et mobilités des ions dans les gaz, Ann. Chim. Phys.,  
219 28, 433–530, 1903.
- 220 Su, T.; Chesnavich, W. J.: Parametrization of the ion–polar molecule collision rate  
221 constant by trajectory calculations, J. Chem. Phys., 76, 5183–5185, 1982.
